# Supplementary material
Source: PubMed Central journal article supplement (PMC6609956)
Supplement: DC182634SupplementaryData.pdf [file DC182634SupplementaryData.pdf]

SUPPLEMENTARY DATA

**Supplementary Table S1.** Weekly summary of physical activity by group

|                                                   | <b>Overall</b>     | <b>Men</b>        | <b>Women</b>       | <b>Black</b>      | <b>White</b>        | <b>Hispanic</b>      |
|---------------------------------------------------|--------------------|-------------------|--------------------|-------------------|---------------------|----------------------|
| <b>*Total Hours of Activity (METs*hours/week)</b> |                    |                   |                    |                   |                     |                      |
| Mean (SD)                                         | 25 (37)            | 30 (43.4)         | 18 (24.2)          | 25.9 (43.8)       | 27.1 (35.6)         | 21.2 (27.7)          |
| Median [IQR]                                      | 13 [3.7, 30.3]     | 16 [4, 35]        | 9.3 [3, 23.5]      | 11.8 [4.5, 30.8]  | 12.3 [2.1, 34.4]    | 13 [3.4, 31.2]       |
| <b>Sleep (hours/week)</b>                         |                    |                   |                    |                   |                     |                      |
| Mean (SD)                                         | 57.2 (13.4)        | 57.8 (14.5)       | 56.4 (11.9)        | 56.4 (11.9)       | 58.5 (10.6)         | 58.2 (19.7)          |
| Median [IQR]                                      | 56.7 [48.8, 64]    | 56.0 [49, 64]     | 58.8 [46.8, 64]    | 56.4 [47.4, 64.5] | 57.8 [49, 64.5]     | 56.0 [48.3, 63.3]    |
| <b>Light Activity (hours/week)</b>                |                    |                   |                    |                   |                     |                      |
| Mean (SD)                                         | 105.6 (15.1)       | 104.4 (16.7)      | 107.4 (12.5)       | 106.2 (13.4)      | 104.4 (14.6)        | 105.1 (19.8)         |
| Median [IQR]                                      | 105.5[98.3, 114.8] | 105.6 [96.8, 114] | 105.1 [100, 116.5] | 106.4 [97.3, 116] | 104.3 [96.7, 112.1] | 105.8 [100.7, 115.6] |
| <b>Moderate Activity (hours/week)</b>             |                    |                   |                    |                   |                     |                      |
| Mean (SD)                                         | 4.3 (6.4)          | 4.6 (7.1)         | 3.9 (5.3)          | 4.0 (6.7)         | 5.2 (7.2)           | 3.5 (3.9)            |
| Median [IQR]                                      | 2.1 [0.7, 5.2]     | 2.1 [0.8, 6.3]    | 2.0 [0.5, 5.2]     | 2.2 [1.0, 5.1]    | 2.0 [0.4, 6.5]      | 1.9 [0.5, 5.3]       |
| <b>Hard Activity (hours/week)</b>                 |                    |                   |                    |                   |                     |                      |
| Mean (SD)                                         | 0.9 (3.4)          | 1.4 (4.3)         | 0.4 (1.3)          | 1.0 (4.7)         | 0.8 (2.2)           | 1.1 (2.7)            |
| Median [IQR]                                      | 0.0 [0, 0]         | 0.0 [0, 0]        | 0.0 [0, 0]         | 0.0 [0, 0]        | 0.0 [0, 0]          | 0.0 [0, 0]           |
| <b>Very Hard Activity (hours/week)</b>            |                    |                   |                    |                   |                     |                      |
| Mean (SD)                                         | 0.2 (1.3)          | 0.3 (1.7)         | 0.0 (0.2)          | 0.4 (2.0)         | 0.2 (0.8)           | 0.0 (0.2)            |
| Median [IQR]                                      | 0.0 [0, 0]         | 0.0 [0, 0]        | 0.0 [0, 0]         | 0.0 [0, 0]        | 0.0 [0, 0]          | 0.0 [0, 0]           |

\*Total hours = total hours of moderate, hard, and very hard activity per week.

SD = Standard Deviation; IQR = Interquartile Range

SUPPLEMENTARY DATA

**Supplementary Table S2.** Predictors of VO<sub>2peak</sub>-FFM

|                             | <b>Variable</b>      | <b>Beta</b> | <b>t-value</b> | <b>p-value</b> | <b>Adjusted R<sup>2</sup></b> |
|-----------------------------|----------------------|-------------|----------------|----------------|-------------------------------|
| <b>Model 1 (unadjusted)</b> | <sup>§</sup> METs    | 0.04        | 2.90           | 0.004          | 0.048                         |
| <b>Model 2</b>              | Age                  | -0.23       | -4.40          | <0.0001        | 0.271                         |
|                             | Male                 | 3.81        | 4.01           | <0.0001        |                               |
|                             | <sup>§</sup> METs    | 0.03        | 2.64           | 0.009          |                               |
|                             | Black                | -1.94       | -1.80          | 0.074          |                               |
|                             | Other Race/Ethnicity | 1.80        | 0.89           | 0.375          |                               |
|                             | Hispanic             | 1.13        | 0.88           | 0.381          |                               |
| <b>Model 3</b>              | Age                  | -0.24       | -4.62          | <0.0001        | 0.284                         |
|                             | Male                 | 3.36        | 3.46           | 0.001          |                               |
|                             | <sup>§</sup> METs    | 0.03        | 2.29           | 0.023          |                               |
|                             | BMI                  | -0.13       | -1.89          | 0.061          |                               |
|                             | Black                | -1.89       | -1.78          | 0.078          |                               |
|                             | Hispanic             | 1.17        | 0.92           | 0.359          |                               |
|                             | Other Race/Ethnicity | 0.92        | 0.45           | 0.654          |                               |
| <b>Model 4</b>              | Male                 | 3.51        | 3.63           | <0.0001        | 0.294                         |
|                             | Age                  | -0.25       | -4.88          | <0.001         |                               |
|                             | <sup>§</sup> METs    | 0.03        | 2.26           | 0.025          |                               |
|                             | BMI                  | -0.13       | -1.89          | 0.061          |                               |
|                             | Black                | -1.68       | -1.57          | 0.118          |                               |
|                             | Hispanic             | 1.25        | 0.98           | 0.327          |                               |
|                             | Other Race/Ethnicity | 0.71        | 0.35           | 0.729          |                               |
|                             | HgbA1c               | -0.43       | -1.72          | 0.880          |                               |
| <b>Model 5</b>              | Age                  | -0.22       | -3.95          | <0.0001        | 0.302                         |
|                             | Male                 | 3.60        | 3.62           | <0.0001        |                               |
|                             | <sup>§</sup> METs    | 0.03        | 2.15           | 0.033          |                               |
|                             | Diabetes Duration    | -0.13       | -1.83          | 0.069          |                               |
|                             | BMI                  | -0.12       | -1.73          | 0.086          |                               |
|                             | Black                | -1.46       | -1.32          | 0.190          |                               |
|                             | HgbA1c               | -0.35       | -1.32          | 0.191          |                               |
|                             | Hispanic             | 1.44        | 1.11           | 0.271          |                               |
|                             | Other Race/Ethnicity | 0.25        | 0.11           | 0.909          |                               |

METS = Metabolic Equivalent Task Units; BMI = Body Mass Index; HgbA1c = glycosylated hemoglobin; <sup>§</sup>METS\*hours/week is excluding sleep and light activity.
